# Supplementary material for: Analysis of CD8+ Treg cells in patients with ovarian cancer: a possible mechanism for immune impairment
Source: PubMed Central journal article supplement — Cell Mol Immunol. 2015 Jul 13;12(5):580–91. doi: 10.1038/cmi.2015.57 (PMC4579658; doi:10.1038/cmi.2015.57), 2015-07-13
Supplement: cmi201557x1.pdf [file cmi201557x1.pdf]

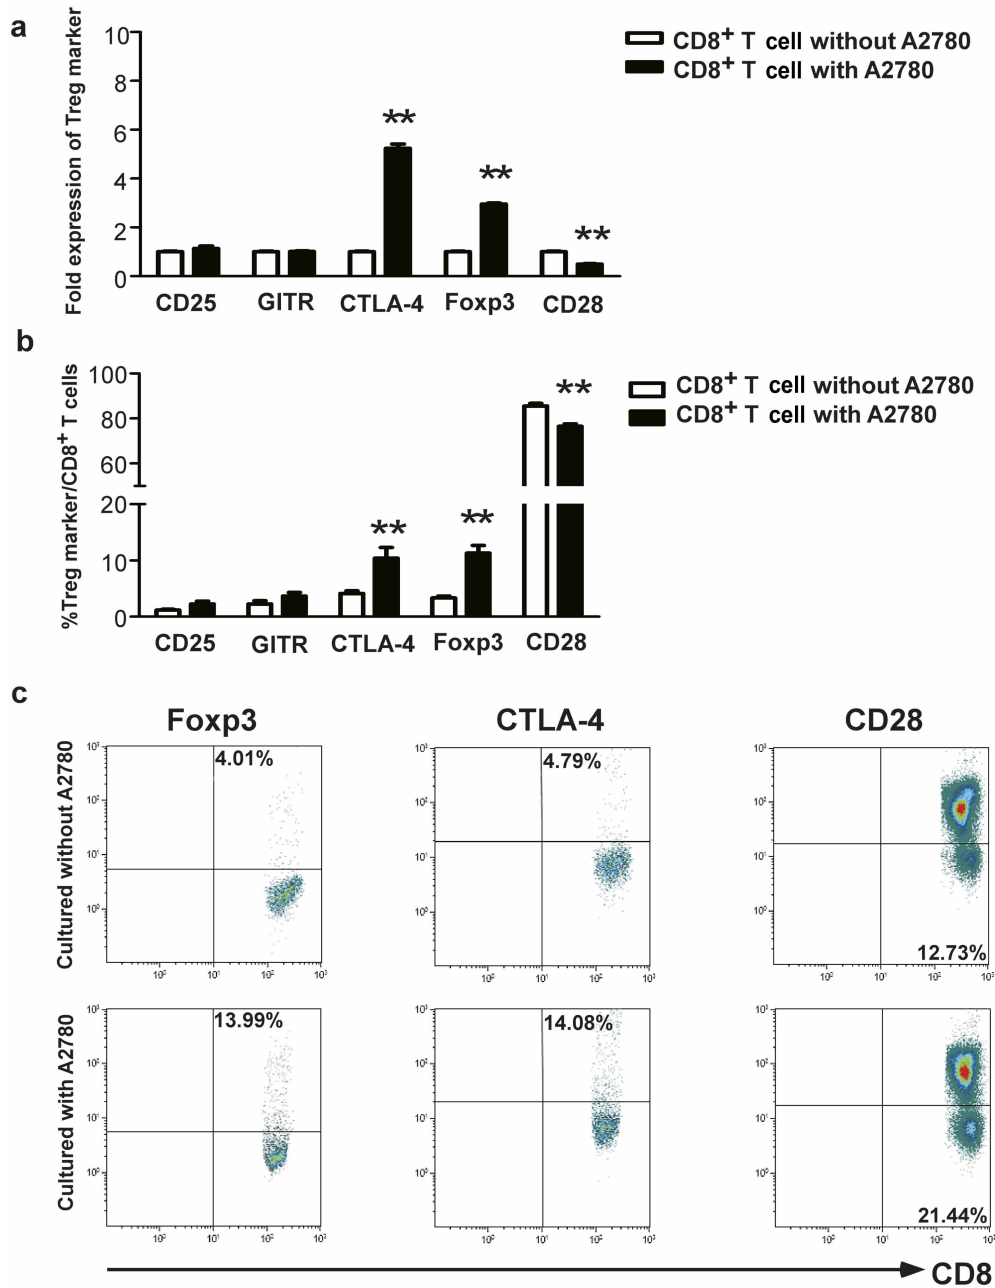

**Figure S1** A2780 cells induce phenotypic differentiation of CD8<sup>+</sup> T cells in a transwell coculture system. **(a)** Expression of CD25, GITR, CTLA-4, Foxp3, and CD28 mRNA in CD8<sup>+</sup> T cells cultured with or without A2780 was analyzed by quantitative real-time PCR. **(b)** CD8<sup>+</sup> T cells in the transwell coculture system with A2780 expressed higher levels of CTLA-4 and Foxp3 molecules and lower levels of CD28 than that in CD8<sup>+</sup> T cells cultured alone. The expression of CD25 and GITR was low, and there was no significant difference between CD8<sup>+</sup> T cells cultured with and without A2780. **(c)** Representative dot plots of CD8 and Foxp3, CD28, and CTLA-4 staining of CD8<sup>+</sup> T cells cultured with or without A2780. \*  $P < 0.05$ , \*\*  $P < 0.01$ .

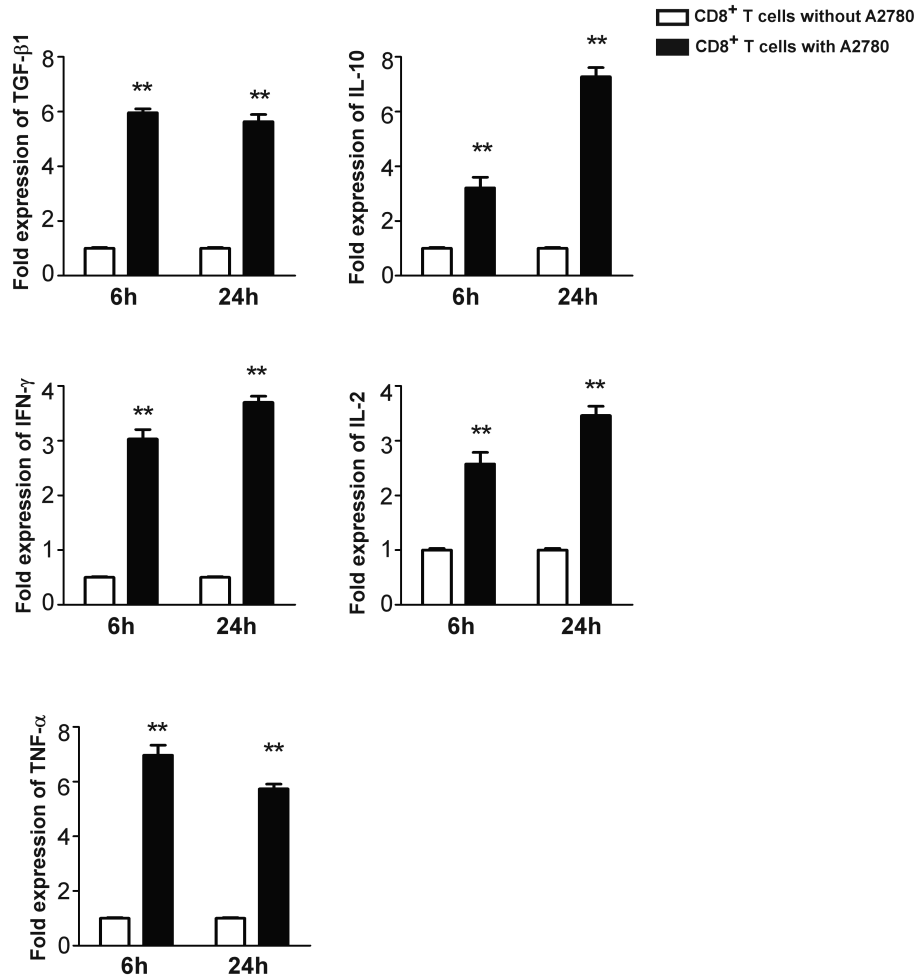

**Figure S2** Cytokine expression profile of in vitro-differentiated CD8<sup>+</sup> Treg cells. Real-time RT-PCR analysis of TGF-β1, IL-10, IFN-γ, IL-2, and TNF-α mRNA expression in CD8<sup>+</sup> T cells cultured with or without A2780. Total RNA was isolated from CD8<sup>+</sup> T cells stimulated with anti-CD3/CD28 mAbs for 6 or 24 h. \*\*  $P < 0.01$ .

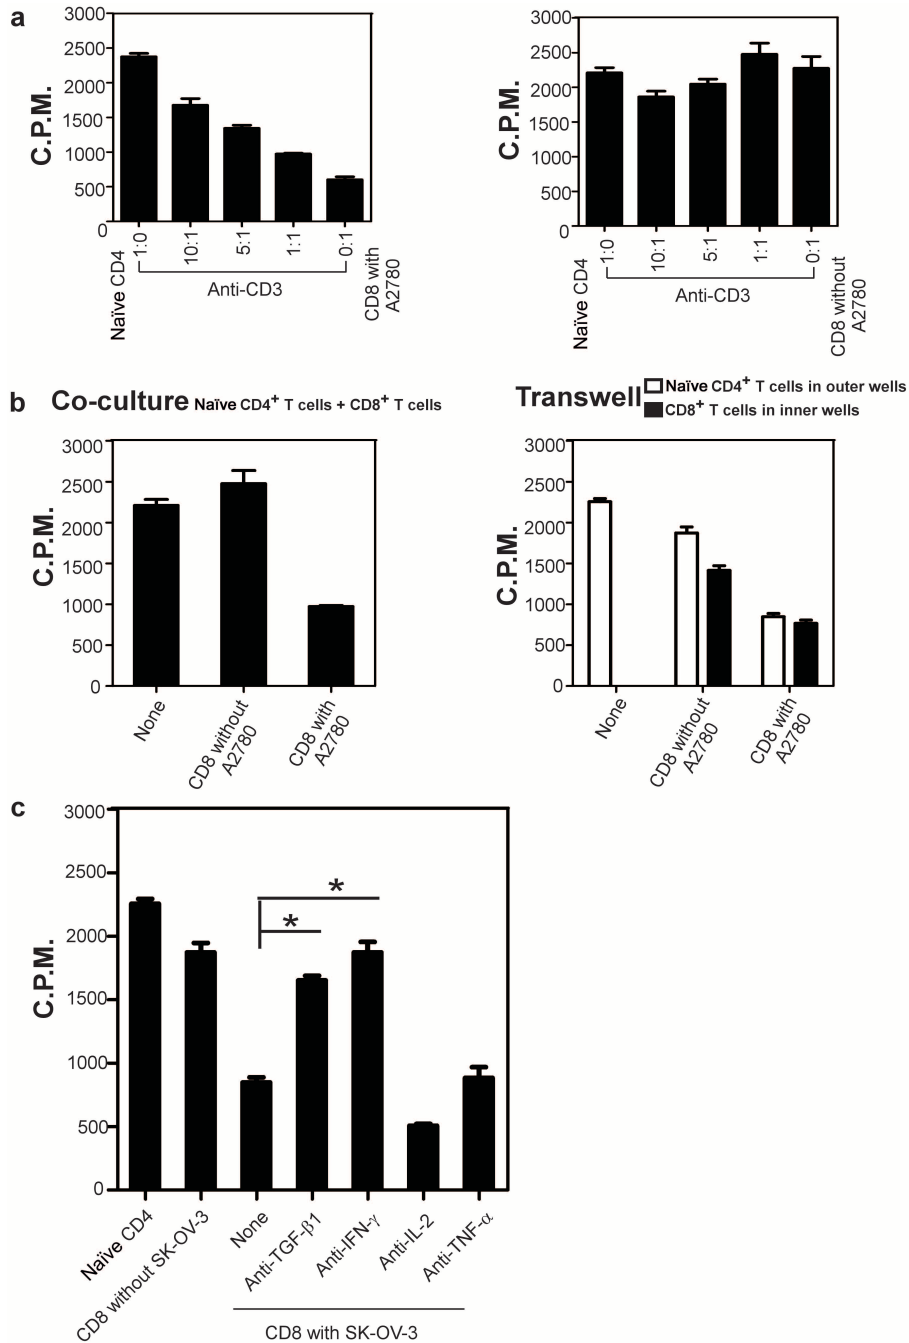

**Figure S3** In vitro differentiated CD8<sup>+</sup> T cells suppressed the proliferation of naive CD4<sup>+</sup> T cells. **(a)** CD8<sup>+</sup> T cells cultured with A2780 suppressed naive CD4<sup>+</sup> T cell proliferation in a dose-dependent manner with stimulation by anti-CD3 mAb. Conversely, CD8<sup>+</sup> T cells cultured alone did not have the suppressive activity. The proliferative response was determined by [<sup>3</sup>H] thymidine uptake. **(b)** Soluble factors were partially required for CD8<sup>+</sup> T cells cultured with A2780 to exert their suppressive effects. In the transwell system, equal numbers of naive CD4<sup>+</sup> T cells were cultured in the outer wells, and CD8<sup>+</sup> T cells cultured with/without A2780 were cultured in the inner wells. **(c)** The suppressor effect of CD8<sup>+</sup> T cells cultured with A2780 was in part blocked when the assay was performed in the presence of an anti-TGF-β1, anti-IFN-γ, anti-IL-2, anti-TNF-α mAb. Data were presented as the mean ± SEM of three independent experiments. \* *P* < 0.05.

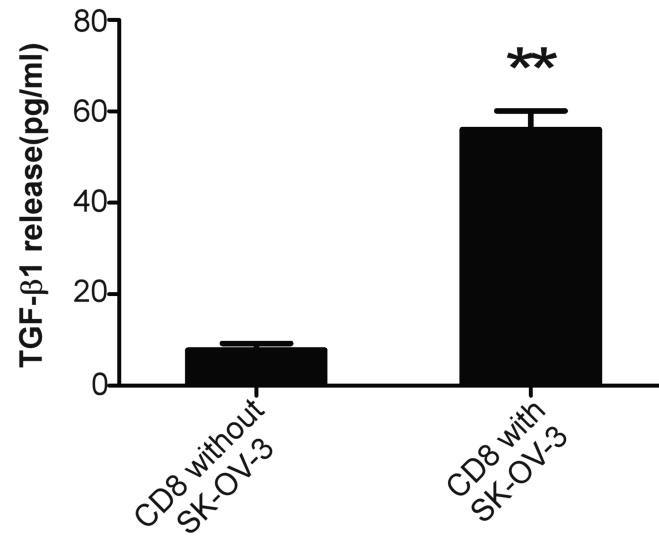

**Figure S4** Expression of TGF-β1 in CD8<sup>+</sup> T cells and SK-OV-3 transwell system. Production of TGF-β1 in medium of transwell system that CD8<sup>+</sup> T cells cultured with/without SK-OV-3 was detected by ELISA, \*\*  $P < 0.01$ .
